# Supplementary material for: Immune Analysis Using Vitreous Optical Coherence Tomography Imaging in Rats with Steroid-Induced Glaucoma
Source: MDPI journal article supplement (doi:10.3390/biomedicines12030633), 2024-03-13
Supplement: s1 [file s1]

SUPPLEMENTARY FIGURE S1.

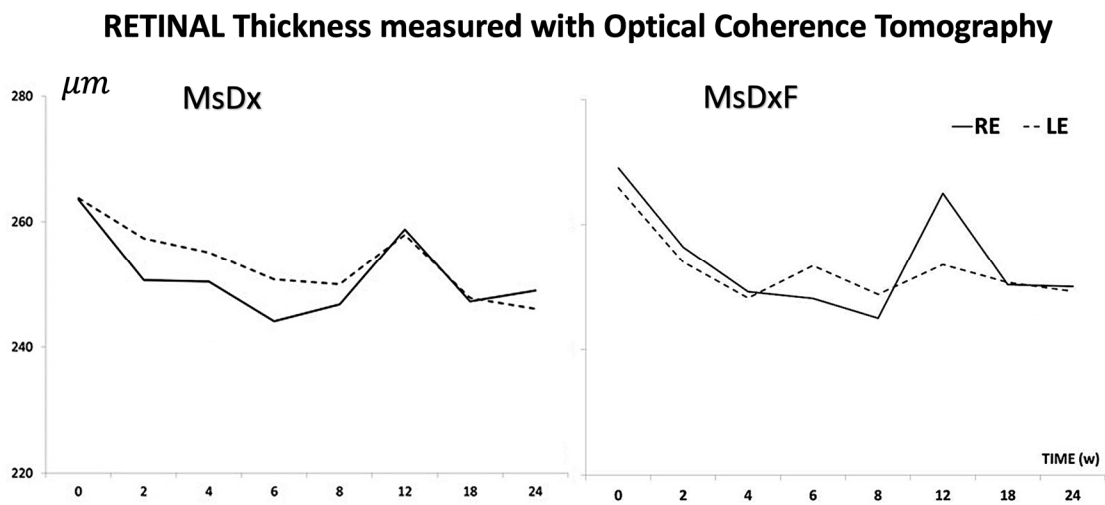

Supplementary Figure S1: Retinal thickness measured with OCT. Abbreviations: MsDx: cohort with microspheres loaded with dexamethasone; MsDxF: cohort with microspheres loaded with dexamethasone and fibronectin injected into the anterior chamber, RE: right eye; LE: left eye; w: weeks. Data extracted from: <sup>19,20</sup> (CYB license).
